# Supplementary figures and images for: PKN1 Kinase: A Key Player in Adipocyte Differentiation and Glucose Metabolism
Source: MDPI journal article supplement (doi:10.3390/nu15102414), 2023-05-22

Supplementary figure S1A

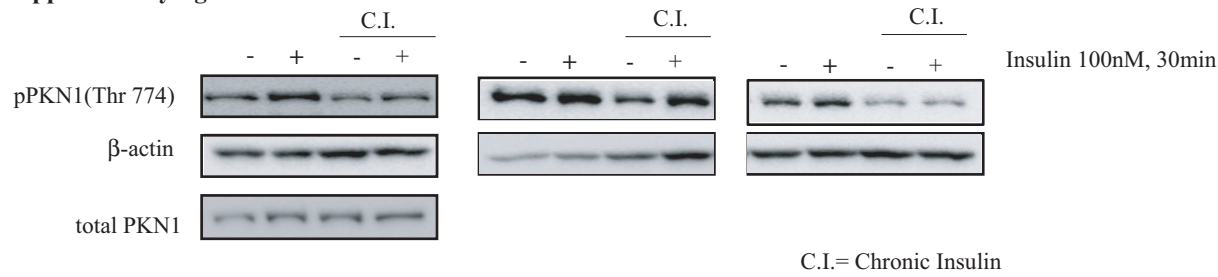

Supplementary figure S1B

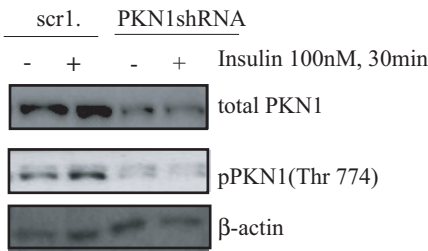

Supplement: s1 [file s1]
